# 1 Low incidence of plastic ingestion among three fish species significant 2 for human consumption on the island of Newfoundland, Canada

3  
4 Max Liboiron<sup>1,2</sup>, Jessica Melvin<sup>2</sup>, Natalie Richárd<sup>1,2</sup>, Jacquelyn Saturno<sup>2,3</sup>, Justine Ammendolia<sup>2</sup>,  
5 France Liboiron<sup>2</sup>, Louis Charron<sup>2</sup>, Charles Mather<sup>1,2</sup>

6  
7 <sup>1</sup>Department of Geography, Memorial University of Newfoundland, St. John's, NL A1B 3X9, Canada

8 <sup>2</sup>Civic Laboratory for Environmental Action Research (CLEAR), Memorial University of Newfoundland, St. John's,  
9 Newfoundland A1B 3X9, Canada

10 <sup>3</sup>School of Fisheries, Marine Institute of Memorial University of Newfoundland, St. John's, NL A1C 5R3, Canada  
11

## 12 Abstract

13 This study reports the first baselines of plastic ingestion for three fish species that are common  
14 food fish in Newfoundland, Canada. Species collections occurred between 2015-2016 for  
15 Atlantic cod (*Gadus morhua*), Atlantic salmon (*Salmo salar*), and capelin (*Mallotus villosus*).  
16 The frequency of occurrence (%FO) of plastic ingestion for both spawning Atlantic salmon  
17 ( $n=69$ ) and capelin ( $n=350$ ) was 0%. Of the 1,010 Atlantic cod collected over two years, 17  
18 individuals had ingested plastics, a %FO of 1.68%. This is the only multi-year investigation of  
19 plastic ingestion in Atlantic cod for the Northwest Atlantic, and the first for capelin and salmon  
20 in the region. Considering the ecological, economic, and cultural importance of these fish  
21 species, this study is the beginning of a longitudinal study of plastic ingestion to detect future  
22 changes in contamination levels.

23  
24 **Keywords:** Atlantic cod, Atlantic salmon, Capelin, Plastic, Ingestion, Human consumption

### 25 **Highlights:**

- 26 • Ingestion rate (%FO) of plastics in Atlantic cod is 1.68%
- 27 • Ingestion rate (%FO) of plastics in Atlantic salmon and capelin is 0%
- 28 • First study of plastic ingestion rates in Atlantic salmon and capelin
- 29 • Multi-year baseline of plastic ingestion in Atlantic cod in the Northwest Atlantic
- 30 • Plastic ingestion rates for three food fish species in Newfoundland, Canada, are low

### 31 **Terms:**

- 32 • Frequency of occurrence (%FO): the number of individuals in a population or group that  
33 have ingested plastics (not indicative of the number of particles ingested per individual)  
34  
35

## 36 Introduction

37 Since its rise as a consumer and commercial material in the 1940s (Meikle, 1997), plastic  
38 production has increased exponentially, giving rise to an estimated production of 400 million  
39 tonnes in 2017 (Hopewell et al., 2009; Plastics Europe, 2016). This growing rate of plastic  
40 production has been reflected by increasing levels of plastic debris in the marine environment  
41 (Barnes et al., 2009; Cózar et al., 2014; Thompson et al., 2004). Surveys from remote areas

1 report marine plastics in diverse ecosystems, including the Arctic, Antarctica, and isolated  
2 islands of the Southern Ocean and South Pacific (Eriksson and Burton, 2003; Lavers and Bond,  
3 2017; Mallory, 2008; Zarfl and Matthies, 2010). Yet, remote, northern regions can still constitute  
4 a blind spot in marine plastics monitoring for a variety of reasons, including high costs, seasonal  
5 restrictions, a lack of research infrastructure, and a lack of standardized monitoring procedures  
6 adapted to harsh environments (Bergmann et al., 2017; McWilliams et al., 2017; Poon et al.,  
7 2017).

8  
9 The northeastern-most Canadian province of Newfoundland and Labrador (NL) comprises of a  
10 section of coastal mainland (Labrador) and an island (Newfoundland). The province of NL is the  
11 most sparsely populated province in Canada, with a population density of 1.4 persons/km<sup>2</sup>  
12 (Statistics Canada, 2012). Much of this human population is concentrated along the coastline  
13 with access to fisheries. To date, only a handful of studies have examined the marine plastic  
14 landscape surrounding Newfoundland, despite the province's high degree of marine industrial  
15 activity and its dependence on the ocean for food, culture, and livelihoods (Canadian Association  
16 of Petroleum Producers, 2017, 2016; Fisheries and Oceans Statistical Services, 2016; The St.  
17 Lawrence Seaway Management Corporation, 2016). Generally, remote islands are characterized  
18 by a high representation of plastic debris from sea-based sources, most commonly through  
19 fishing and shipping activities (UNEP, 2009). These activities are expected to be significant  
20 contributors to the marine plastic landscape around the island of Newfoundland, considering the  
21 waters surrounding the island contribute over 80% of the national fisheries landings (Fisheries  
22 and Oceans Canada, 2017a) and facilitate the movement of over 160 million tonnes of shipping  
23 cargo annually (The St. Lawrence Seaway Management Corporation, 2016).

24  
25 Despite the low human population, land-based sources of marine plastics should also be  
26 considered in Newfoundland. It is estimated that the province generates 493,595 metric tonnes of  
27 solid municipal waste per year (Auditor General of Newfoundland and Labrador, 2014). In 2016,  
28 a provincial highway litter audit reported that 42.7% of all collected litter from across the  
29 province were of plastic origin (13,745 of 32,190 pieces) (Multi-Materials Stewardship Board,  
30 2016). Terrestrial waste can be transferred to the marine environment through numerous  
31 pathways typical of coastal regions such as wind and run-off, but some local waste management  
32 practices may increase these rates in NL. Most rural municipal sewerage is not treated in the  
33 province, and 760 sewer outfalls release 39,000 m<sup>3</sup> of effluent daily (Government of  
34 Newfoundland and Labrador, 2016). Small-scale incineration and open burning of waste, as well  
35 as direct dumping remain an issue in rural, outport communities (Avery-Gomm et al., 2016;  
36 Government of Newfoundland and Labrador, 2017; Henemen, 1988).

### 37 *The significance plastic ingestion by fish in Newfoundland*

38 Plastic ingestion by fish is a primary concern in Newfoundland. Since over 90% of surface water  
39 marine plastics are less than 5 millimeters in size (Eriksen et al., 2014), they have a high degree  
40 of bioavailability to a wide range of trophic levels in the marine food web. Marine plastics are  
41 associated with contaminants that can take the form of ingredients and by-products of the plastic  
42 material itself (such as UV stabilizers, softeners, flame retardants, non-stick compounds and  
43 colourants), as well as contaminants adsorbed from the surrounding seawater (such as PCBs and  
44 DDT) (Lithner et al., 2012; Mato et al., 2001; Rochman et al., 2015). The accumulation of toxic  
45 chemicals in marine species can be transferred up the food chain via biomagnification, thus

1 potentially negatively affecting apex predators like humans (Ochi, 2009; Teuten et al., 2009;  
2 Browne et al., 2013; Rochman et al., 2013; Koelmans et al., 2016). Industrial chemicals  
3 associated with marine plastics have been correlated to negative health effects in humans,  
4 including endocrine disruption, heart disease, and developmental disorders (Colborn et al., 1994;  
5 Kim et al., 2002; Lang et al., 2008; Melzer et al., 2010). Despite these preliminary links further  
6 research is required to better understand the full effects that plastics consumed at lower trophic  
7 levels in the food web can have on top consumers (Cole et al., 2011; Engler, 2012). Nonetheless,  
8 the burden of polluted wild food sources disproportionately affects rural and low-income  
9 communities where country foods are relied on for sustenance (Shepard et al., 2002).

10  
11 Despite the devastating collapse of the Atlantic cod (*Gadus morhua*) stock in Newfoundland and  
12 the resulting moratorium on its fishery in 1992, fishing - both “recreational” (sustenance) and  
13 commercial - remains financially and culturally important to the people of Newfoundland. In  
14 2016, commercial fisheries employed over 17,000 individuals and landed over 220,000 tonnes of  
15 catch (fish and shellfish) resulting in a production value of \$1.4 billion (Fisheries and Land  
16 Resources, 2017). Within the context of the Newfoundland fishery, Atlantic cod yielded the  
17 second highest landed value for all captured groundfish species in the country (~\$23 million),  
18 while capelin (*Mallotus villosus*) yielded the highest landed value of all pelagic species (~\$13.5  
19 million) (Fisheries and Oceans Canada, 2017b). The provincial recreational fisheries have one of  
20 the highest participation rates in Canada with 71,382 participants in 2010 (Fisheries and Oceans  
21 Canada, 2012a). Most of this participation comes from the recreational groundfish fishery for  
22 Atlantic cod that does not allow the selling of catch (Fisheries and Oceans Canada, 2012a;  
23 Government of Canada, 2017). Fishers retain their catch (as opposed to catch and release), and  
24 fish are relied on for sustenance (Fisheries and Oceans Canada, 2012a). In a study of seafood  
25 preferences in rural communities in Western Newfoundland, both Atlantic cod and Atlantic  
26 salmon were the species most commonly consumed by respondents (81% and 42%,  
27 respectively), while capelin was eaten less often, but remained a part of the diet of a majority of  
28 respondents (Lowitt, 2013).

29  
30 This research provides a baseline for plastic ingestion in these three common Newfoundland  
31 food fish; Atlantic cod, Atlantic salmon, and capelin. This research: (1) builds upon and validates  
32 the existing preliminary finding of a %FO of 2.45% in Atlantic cod collected in 2015 from the  
33 eastern coast of Newfoundland (Liboiron et al., 2016) to generate a validated, multi-year baseline  
34 for plastic ingestion in Atlantic cod of the Northwest Atlantic; and (2) establishes baselines of  
35 plastic ingestion in Atlantic salmon and capelin on the island of Newfoundland. Based on a  
36 review of English-language, published, scientific literature, no previous studies on the ingestion  
37 of plastics by Atlantic salmon or capelin exist. Other studies of plastic ingestion in Atlantic cod  
38 in the Northeast Atlantic have been conducted the North and Baltic seas (Bråte et al., 2016;  
39 Foekema et al., 2013; Lenz et al., 2015a; Rummel et al., 2016). The production of a baseline of  
40 plastic ingestion levels in these three species is the first step towards a reliable and useful long-  
41 term monitoring program for the region, especially given their cultural, ecological, and economic  
42 value on the island of Newfoundland.

## 43 Methods

## 1 Collection protocols

2 This study synthesises plastic ingestion data from different projects conducted around the island  
3 of Newfoundland between 2015 and 2016. Accordingly, the geographical range of sampling  
4 covered much of the island's inshore bays and harbours, as well as offshore regions in the Gulf  
5 of St. Lawrence, the Grand Banks, as well as a collection site north of Labrador (Davis Strait)  
6 (Fig. 1). "Offshore" was considered as any region >30 km from the shoreline whereas "inshore"  
7 was an area <30 km from the shoreline (30 km was selected based on the distance indicated by  
8 fishers whose activities are governed by these categories). Recreational fishers generally  
9 captured fish within 10 km of the shoreline, while commercial and scientific collections almost  
10 exclusively captured fish from at least 30 km offshore. Fish were collected using one of two  
11 methods; (1) collaborations with existing scientific surveys (SS) offshore (Atlantic cod, Atlantic  
12 salmon and capelin), and (2) citizen science surveys (CSS) of inshore recreational fisheries  
13 (Atlantic cod). Gastrointestinal (GI) tracts were removed in the field for both Atlantic cod and  
14 Atlantic salmon, while capelin were collected whole. Collection methods within the study are  
15 outlined in Table 1. For further details regarding collection protocols refer to S1.  
16

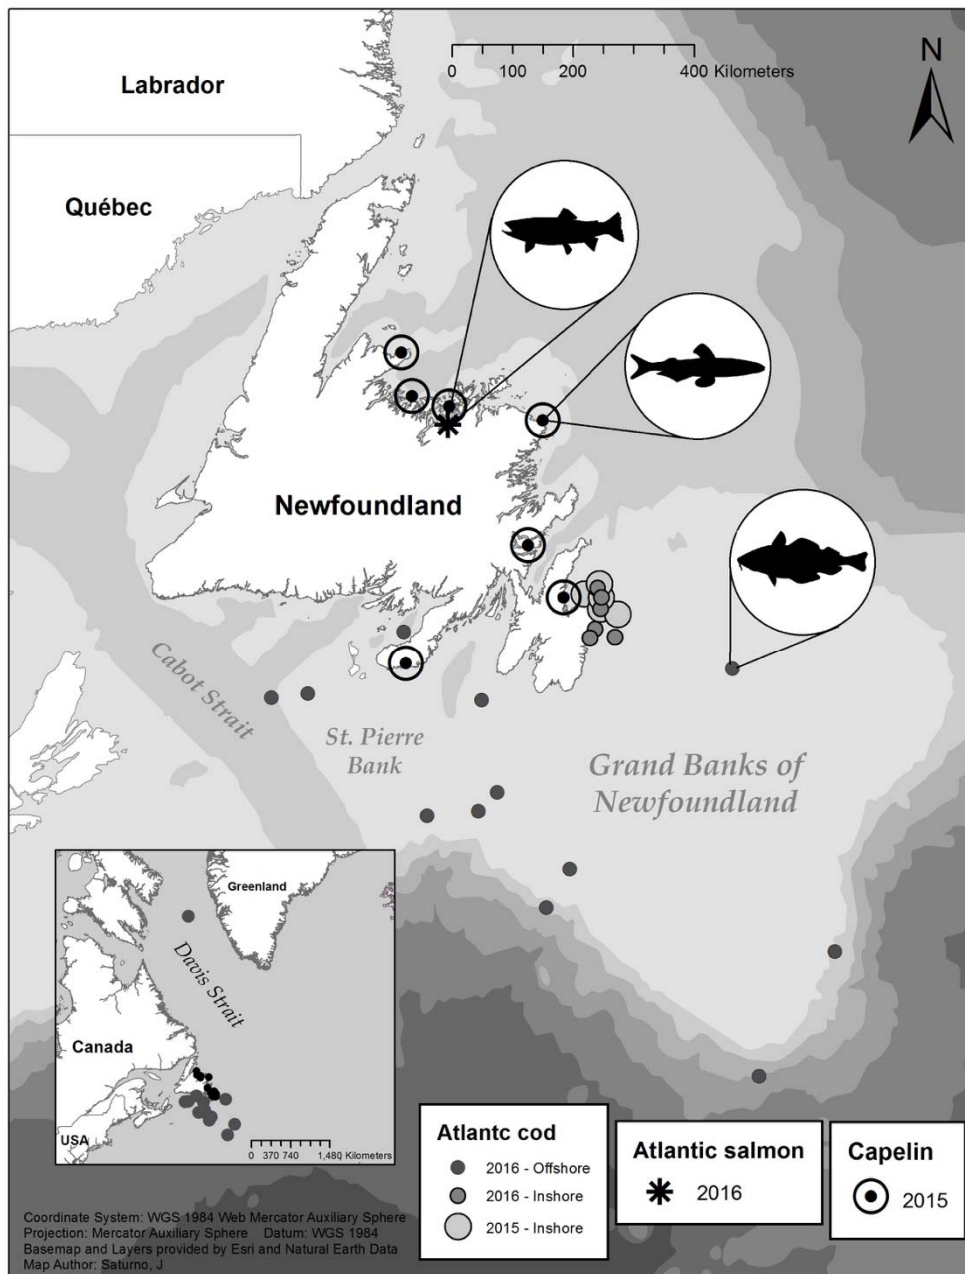

1  
2 **Fig. 1.** Collection locations for the Atlantic cod, Atlantic salmon, and capelin from 2015-16  
3 (map: J. Saturno).  
4

5

1 **Table 1.** Summary of collection details for the Atlantic cod, Atlantic salmon and capelin  
 2 examined for plastic ingestion rates.

| Collection details                    | Atlantic cod<br>( <i>Gadus morhua</i> )                                                                                 |                                                                                                                                    |                                                                                                                                                                                                                                           | Atlantic salmon<br>( <i>Salmo salar</i> )                               | Capelin<br>( <i>Mallotus villosus</i> )                                                                                                      |
|---------------------------------------|-------------------------------------------------------------------------------------------------------------------------|------------------------------------------------------------------------------------------------------------------------------------|-------------------------------------------------------------------------------------------------------------------------------------------------------------------------------------------------------------------------------------------|-------------------------------------------------------------------------|----------------------------------------------------------------------------------------------------------------------------------------------|
| <b>Sample size (n)</b>                | 204                                                                                                                     | 348                                                                                                                                | 458                                                                                                                                                                                                                                       | 69                                                                      | 350                                                                                                                                          |
| <b>Collection date (month, year)</b>  | October 2015                                                                                                            | July - October 2016                                                                                                                | April - June 2016                                                                                                                                                                                                                         | February - October 2016                                                 | July 2015                                                                                                                                    |
| <b>Collection method</b>              | Citizen Science Survey                                                                                                  | Citizen Science Survey                                                                                                             | Scientific Survey                                                                                                                                                                                                                         | Citizen Science Survey                                                  | Scientific Survey                                                                                                                            |
| <b>Environment</b>                    | Marine                                                                                                                  | Marine                                                                                                                             | Marine                                                                                                                                                                                                                                    | Freshwater                                                              | Marine                                                                                                                                       |
| <b>Sample sites</b>                   | (1) Quidi Vidi<br>(2) Petty Harbour<br>(3) Portugal Cove - St. Philip's                                                 | (1) Quidi Vidi<br>(2) Petty Harbour<br>(3) Portugal Cove - St. Philip's<br>(4) Witless Bay<br>(5) Bauline East<br>(6) Brigus South | NAFO divisions: 3Ps, 3O, 3N, 3L, 0B<br>(1) Placentia Bay<br>(2) St. Pierre Bank<br>(3) Fortune Bay<br>(4) Burgeo Bank<br>(5) Green Bank<br>(6) Halibut Channel<br>(7) Southern Grand Banks<br>(8) Eastern Grand Banks<br>(9) Davis Strait | Campbellton River                                                       | NAFO divisions: 3Ps, 3L, 3K<br>(1) Bonavista Bay<br>(2) Conception Bay<br>(3) White Bay<br>(4) Notre Dame Bay<br>(5) Trinity Bay<br>(6) Lawn |
| <b>Variables recorded</b>             | Food presence <sup>a</sup><br>Body length (n=38)<br>Sex (n=38)<br>Sample site<br>Inshore/ offshore <sup>c</sup><br>Date | Food presence <sup>a</sup><br>Body length (n=325)<br>Sex (n=287)<br>Sample site<br>Inshore/ offshore <sup>c</sup><br>Date          | Food presence <sup>a</sup><br>Sex (n=445)<br>Depth of collection <sup>b</sup><br>Sample site<br>NAFO division<br>Inshore/ offshore <sup>c</sup><br>Date                                                                                   | Food Presence <sup>a</sup><br>Body length<br>Sex<br>Sample site<br>Date | Food Presence <sup>a</sup><br>Body length<br>Sample site<br>NAFO division<br>Date                                                            |
| <b>Plastic identification methods</b> | Visual                                                                                                                  | Visual<br>Raman Spectrometry                                                                                                       | Visual<br>Raman Spectrometry                                                                                                                                                                                                              | Visual<br>Raman Spectrometry                                            | Visual<br>Raman Spectrometry                                                                                                                 |

3 <sup>a</sup>Food was considered present if prey items were found in the GI tract (stomach and/or intestines)

4 <sup>b</sup>Depth of collection (range: 46-442m) data points were only obtained for Atlantic cod collected via Scientific Survey (SS) (n=458)

5 <sup>c</sup>Offshore collections occurred in any region >30 km from the shoreline whereas inshore was an area <30 km from the shoreline

## 6 Laboratory procedures

### 7 *Dissection of GI tracts*

8 We used standardized laboratory plastic ingestion protocols identical to Liboiron et al., (2016) to  
 9 compare previous studies in the province, which in turn have been modified from those used in  
 10 bird ingestion studies by van Franeker et al., (2011). GI tracts (or whole fish in the case of  
 11 capelin) were thawed for at least 2 hours prior to dissection. Once thawed, an incision was made  
 12 along the entire length of the tract, from the esophagus to anus. A double sieve method was used  
 13 for analyzing Atlantic cod and salmon by rinsing and scraping GI tract contents onto stacked  
 14 sieves with mesh sizes of 4.75 mm (#4) and 1 mm (#18) to aid in sorting items. Due to the small



1 size of capelin and their natural prey items (zooplankton), a single 1 mm sieve was used for  
2 capelin GI tracts. Once digestive contents were transferred to sieves, the GI tracts were visually  
3 and tactilely inspected for imbedded debris and thoroughly rinsed over the sieves. Sieve contents  
4 were continuously and gently rinsed with cold water so any organic and inorganic debris were  
5 removed from plastic particles to enable proper identification (Löder and Gerdts, 2015). Any  
6 particles suspected to be non-food items (anthropogenic or not) were removed and transferred to  
7 a petri dish for further analysis. The presence or absence of prey/digestive content in the stomach  
8 and/or intestines was noted. Although rare, there were some instances of relatively intact fish in  
9 the GI tract contents that were viable for secondary plastic ingestion analysis ( $n=5$ ) but were too  
10 degraded for a positive species identification. These prey fish were analysed following the same  
11 methods described above in an attempt to identify the secondary ingestion of plastics.

## 12 *Contamination*

13 Plastic contaminants were occasionally found on the external surface of the stomach and/or  
14 intestines for Atlantic cod ( $n=15$ ). These particles were identified as wood splinters and paint  
15 chips that visually matched the inventory of field tools and were assumed to have been  
16 transferred during sample collection. To control for microplastic contamination in the  
17 laboratory, we used a cotton laboratory coat, wore gloves, tied hair back, rinsed all tools under  
18 tap water before and after each sample, and used daily control sticky dishes to capture particles  
19 settling from the air. In the event that a fibre was found in a GI tract, it was compared to fibres  
20 present in the control dish.

## 21 *Quantification of plastics*

22 Visual identification of microplastics through use of a microscope has been confirmed as a  
23 reliable method for identifying particles greater than 1 mm in size (Song et al., 2015). As such, in  
24 deference to a protocol that could be used by citizen scientists, the lower limit of plastics  
25 identifiable by this research is restricted to 1 mm in the largest dimension.

26  
27 Each particle that was identified as a probable plastic was individually wrapped in filter paper  
28 and dried for at least five days. Once dried, particles were visually examined under a  
29 stereomicroscope (Olympus SZ61 stereomicroscope, maximum magnification 45X), and a  
30 compound microscope (Ecoline, Eco Series, maximum magnification 100X). Particles identified  
31 as plastic at this stage were set aside to be verified by Raman micro-spectrometry (see section  
32 below).

33  
34 Plastic ingestion is most commonly quantified in the literature as a frequency of occurrence  
35 (%FO), a metric that is indicative of the number of individuals in a sample population that  
36 ingested plastic(s) (Cannon et al., 2016; Peters et al., 2017; Provencher et al., 2016; Rochman et  
37 al., 2015; Romeo et al., 2015; Rummel et al., 2016). Following this metric, we recorded and  
38 quantified the presence or absence of plastic(s) for each individual fish and calculated the  
39 population average (%FO). The colour, weight, length, type and weathering details of plastics  
40 were recorded. Plastics were weighed on a scale sensitive to 0.0001 g and length measurements  
41 were taken from the longest axis of the plastic using digital calipers sensitive to 0.01 mm. There  
42 remains a debate in the literature over the designation of plastic size classes in terms of micro,  
43 meso, and macro designations (GESAMP, 2015). Following the designations used by Bråte et al.

1 (2016) and Cannon et al. (2016), and the recommendation of Provencher et al. (2016) for  
2 standardization, plastics smaller than 5 mm in maximum length were classified as microplastics,  
3 while plastics from 5-20 mm were classified as mesoplastics (and those over 20 mm as  
4 macroplastics, though such plastics are rare in ingestion studies). When plastics were measured  
5 they were not stretched or manipulated to facilitate a longer axis, but were measured according to  
6 their size at time of recovery (Avery-Gomm et al., 2016; Liboiron et al., 2016). The size of  
7 ingested plastics is important to record because it is necessary to evaluate how much surface area  
8 plastics occupy in the GI tract and the surface area available for the transfer of contaminants  
9 (Jabeen et al., 2017; Mato et al., 2001; Provencher et al., 2016; Rummel et al., 2016; Silva-  
10 Cavalcanti et al., 2017).

11  
12 Plastic types were categorized as either: industrial resin pellets, sheet/film (i.e. plastic bags),  
13 threads (i.e. fishing line, rope), foamed plastics (i.e. polystyrene packaging), fragments (i.e. hard  
14 plastics), fibres (i.e. from clothing), microbeads (i.e. from personal care products) or other. In  
15 order to evaluate the state of plastic erosion each particle was assessed for: discolouration,  
16 fraying, fracturing, pits and grooves, and adhered particles (following Corcoran et al., 2009), as  
17 well as burning or melting (following Avery-Gomm et al., 2016).

### 18 *Raman micro-spectrometry*

19 Raman micro-spectrometry was conducted on particles obtained from: Atlantic cod collected in  
20 2016, Atlantic salmon and capelin. This analysis was not available for the Atlantic cod collected  
21 in 2015. However, no plastics from 2015 were visually ambiguous. Particles were washed in  
22 ethanol and allowed to dry in preparation for Raman micro-spectrometry. Samples were then  
23 placed on a silica wafer of known Raman spectrum (520 cm<sup>-1</sup> peak) and analysed using a Raman  
24 micro-spectrometer (Reinshaw InVia with 830 nm excitation) set at a 20x Olympus objective. To  
25 ensure samples were not burnt during the processing, laser power did not exceed 5%, and in  
26 cases of high fluorescence (in 4/5 samples), laser power was reduced to 1%. Results were  
27 analysed by using WiRE 3.4 software. A reference spectra was used to compare the Raman  
28 spectrum of each experimental sample to the following common marine plastic polymers:  
29 acrylonitrile butadiene styrene (ABS), cellulose acetate, polyamide (PA), polycarbonate (PC),  
30 polyethylene (PE), polyethylene terephthalate (PET), poly (methyl methacrylate) (PMMA),  
31 polypropylene (PP), polystyrene (PS), polyurethane (PU) and polyvinylchloride (PVC) (Bråte et  
32 al., 2016; Engler, 2012; Lenz et al., 2015b; Plastics Europe, 2016).

### 33 **Data Analysis**

34 When frequency of occurrence for a species was >0% (Atlantic cod), the relationship between  
35 %FO and the following variables were evaluated: 1) food presence, 2) sex, 3) depth of collection,  
36 4) sample site, 5) NAFO management area, 6) distance offshore, 7) day of year (DOY), 8)  
37 month, and 9) year. Each variable was modelled using a generalized linear model with a  
38 binomial error structure. Assumptions of residuals homogeneity, independence and normality  
39 were visually tested and met for all models using lag plots, residual versus fit plots, and quantile-  
40 quantile (QQ) plots. Models were then tested with a ANOVA for hypothesis testing; the null  
41 hypothesis was rejected when  $p < 0.05$  (95% confidence interval). All analyses were carried out  
42 using R Studio version 1.0.143. All graphs were generated using Prism Graphpad version 7.0



1 (Prism and Graphpad, 2016) and maps were generated using ArcGIS version 10.5.1 (ESRI,  
2 2014).

3  
4 Plastic characteristics (type, colour, length, mass, weathering and polymer) were quantified as a  
5 percentage of all particles. The Joint Research Centre of the European Commission recommends  
6 that for the standardization of plastic ingestion research, in addition to the %FO, the following  
7 metrics be reported: “1) abundance by number (average number of items per individual), and 2)  
8 abundance by mass (weight in grams, accurate to 4<sup>th</sup> decimal)” (Galgani et al., 2013, p. 78). Both  
9 of these metrics were calculated for the entire sample population of Atlantic cod ( $n=1,010$ ), as  
10 well as for the sub-population of individuals that had ingested plastic ( $n=17$ ). Particles that could  
11 not be weighed (because they were lost prior to weighing or were too small to register) were  
12 assigned a mass of 0 g for calculations involving the entire sample population, and removed for  
13 calculations for the sub-population of individuals with ingested plastics.

## 14 Results

15 A total of 1,429 individuals from 3 species were collected and plastics were found to have been  
16 ingested by 17 individuals (all Atlantic cod), resulting in a multi-species %FO of 1.19%  
17 ( $n=1,429$ ,  $SD=0.110$ ). Although %FO of plastics is commonly reported for multi-species  
18 populations (Anastasopoulou et al., 2013; Davison and Asch, 2011; Neves et al., 2015; Phillips  
19 and Bonner, 2015), this study will focus on %FO for separate species so that trends can be  
20 clearly examined (Table 2). This is particularly important in species with 0%FO, to avoid false  
21 connotations of ubiquitous plastic consumption by all fish species (Liboiron et al., 2018).

22  
23 **Table 2.** Summary of the results for plastic ingestion rates (%FO) among three fish species  
24 collected from Newfoundland.

25

| Species                                   | Collection year(s) | Sample size ( $n$ ) | Mean plastic ingestion rate (%FO $\pm$ SD) |
|-------------------------------------------|--------------------|---------------------|--------------------------------------------|
| Atlantic cod<br>( <i>Gadus morhua</i> )   | 2015-2016          | 1,010               | 1.68 $\pm$ 0.129                           |
| Atlantic salmon<br>( <i>Salmo salar</i> ) | 2016               | 69                  | 0                                          |
| Capelin<br>( <i>Mallotus villosus</i> )   | 2015               | 350                 | 0                                          |

26

### 27 Atlantic cod

28 A total of 1,010 Atlantic cod were collected and 17 fish were found to have ingested plastic, a  
29 %FO of 1.68% ( $n=1,010$ ,  $SD=0.130$ ). None of the GI tracts found to contain plastic had any  
30 holes or perforations. One GI tract that contained plastic had green paint from a green splitting

1 table on the exterior wall prior to dissection; this paint was discounted as contamination. All but  
2 two of the 17 fish with ingested plastic ( $n=15$ ) had ingested only one plastic, while two of the  
3 fish collected in 2015 had ingested two plastics each. The mean number of plastics ingested per  
4 individual for the entire sample was 0.019 particles/individual ( $n=1,010$ ,  $SD=0.150$ ). Of the sub-  
5 population of Atlantic cod that had ingested plastic, the mean number of plastic particles  
6 ingested per individual is 1.12 particles/individual ( $n=17$ ,  $SD=0.330$ ).  
7

8 The %FO of the 2015 citizen science survey collection did not significantly differ from  
9 individuals collected in 2016 ( $p=0.730$ ,  $df=1$ ,  $n=552$ ). Therefore, the subsequent analyses of  
10 these datasets were combined (with the exception of the analysis of year as an independent  
11 variable) and are hereafter referred to as the citizen science survey (CSS). A total of 12 of 552  
12 fish from the CSS of Atlantic cod had ingested plastic, yielding a %FO of 2.17% ( $n=552$ ,  
13  $SD=0.150$ ). The scientific survey (SS) of Atlantic cod found plastic in 5 out of 458 fish collected  
14 for a %FO of 1.09% ( $n=458$ ,  $SD=0.100$ ). The comparison of the CSS and SS collections yielded  
15 no significant difference in plastic ingestion ( $p=0.170$ ,  $df=1$ ,  $n=1,010$ ), and are therefore  
16 presented together as a total %FO (1.68%) for the species in Table 2.  
17

18 The results of binomial generalized linear model fits of plastic ingestion are presented in Table 3.  
19 Notably, both food presence and sex were each significantly related to %FO ( $p<0.05$ ), while  
20 there was no evidence of a significant relationship between %FO and temporal or regional  
21 variables ( $p>0.05$ ). All 17 individual cod that had ingested plastic had also ingested other food  
22 items. Although most individuals had consumed food (71%), the presence of food in the stomach  
23 was a significant factor in positively predicting the presence of ingested plastic ( $p<0.01$ ),  
24 whereby individuals that ingested prey were more likely to contain plastic. Sex was identified for  
25 10 out of the 17 individuals with ingested plastic. Of these 10 individuals, 9 were females.  
26 Females were determined to have a significantly higher %FO than males ( $p<0.05$ ).  
27  
28

1 **Table 3.** Independent variables found that had a statistically significant effect (indicated by  
 2 bolding) on the %FO of plastic ingestion in Atlantic cod (Atlantic salmon and capelin were not  
 3 tested, due to an absence of ingested plastics). Dashes represent the scenario in which there was  
 4 not enough data present to conduct analysis. [IV= explanatory variable; CSS=2015-2016 citizen  
 5 science surveys; SS=scientific surveys]

| IV                   | Metric               | CSS          | SS           | Combined     |
|----------------------|----------------------|--------------|--------------|--------------|
| <b>Food presence</b> | n                    | <b>552</b>   | 456          | <b>1,008</b> |
|                      | df                   | <b>1</b>     | 1            | <b>1</b>     |
|                      | Pr(>X <sup>2</sup> ) | <b>0.002</b> | 0.110        | <b>0.001</b> |
| Body length          | n                    | 363          | -            | -            |
|                      | df                   | 1            | -            | -            |
|                      | Pr(>X <sup>2</sup> ) | 0.799        | -            | -            |
| <b>Sex</b>           | n                    | 324          | <b>441</b>   | <b>765</b>   |
|                      | df                   | 1            | <b>1</b>     | <b>1</b>     |
|                      | Pr(>X <sup>2</sup> ) | 0.360        | <b>0.012</b> | <b>0.020</b> |
| Depth                | n                    | -            | 458          | -            |
|                      | df                   | -            | 1            | -            |
|                      | Pr(>X <sup>2</sup> ) | -            | 0.160        | -            |
| Sample site          | n                    | 540          | 458          | 999          |
|                      | df                   | 5            | 7            | 14           |
|                      | Pr(>X <sup>2</sup> ) | 0.220        | 0.064        | 0.050        |
| NAFO                 | n                    | -            | 458          | 998          |
|                      | df                   | -            | 4            | 4            |
|                      | Pr(>X <sup>2</sup> ) | -            | 0.077        | 0.056        |
| Inshore/Offshore     | n                    | 552          | 458          | 1,010        |
|                      | df                   | 1            | 1            | 1            |
|                      | Pr(>X <sup>2</sup> ) | 0.440        | 0.410        | 0.590        |
| DOY                  | n                    | 348          | 458          | 997          |
|                      | df                   | 1            | 1            | 1            |
|                      | Pr(>X <sup>2</sup> ) | 0.360        | 0.380        | 0.086        |
| Month                | n                    | 348          | 458          | 997          |
|                      | df                   | 1            | 1            | 1            |
|                      | Pr(>X <sup>2</sup> ) | 0.830        | 0.710        | 0.120        |
| Year                 | n                    | -            | -            | 1,010        |
|                      | df                   | -            | -            | 1            |
|                      | Pr(>X <sup>2</sup> ) | -            | -            | 0.360        |

## 1 Atlantic salmon

2 None of the 69 Atlantic salmon that were caught in 2016 had ingested any plastics, yielding a  
3 %FO of 0% for the species. Notably, only 20% of individuals had ingested food. This proportion  
4 was considerably less than what was found in Atlantic cod (see above), though salmon are  
5 caught while spawning, while cod are not.

## 6 Capelin

7 Of the 350 capelin collected, no individuals were found to have ingested plastics (%FO=0%).  
8 Similar to the Atlantic salmon sample, the proportion of fed individuals was low at just 37%.  
9 Also like Atlantic salmon, capelin are caught while spawning.

## 10 Plastic forensics

11 The most common plastic type was fragments ( $n=6$ ), followed by threads ( $n=5$ ), then fibres and  
12 sheet/film plastics ( $n=4$  per category) (Fig. 2A). The particle lengths (longest dimension) ranged  
13 from 1.6 mm to 12.1 mm, with a mean length of 5.6 mm ( $n=16$ ,  $SD=3.140$ ). The majority of  
14 particles were microplastics ( $n=11$ ) (Fig. 2B). Size could not be recorded for three plastic  
15 particles that were visually identifiable as microplastics, either because they were lost prior to  
16 analysis ( $n=2$ ), or were too small to register by the calipers ( $n=1$ ).

17  
18

1 **Table 4.** Plastic characteristics and measurements for particles recovered from Atlantic cod  
 2 captured in Newfoundland from 2015 to 2016. Offshore (OS) and inshore (IS) collection sites  
 3 are noted per location, where offshore was considered >30 km from the shoreline and inshore  
 4 was <30 km from the shoreline.

| Location             | Polymer          | Type     | Mass (g) | Length (mm) | Colour    | Erosion                                               |
|----------------------|------------------|----------|----------|-------------|-----------|-------------------------------------------------------|
| Quidi Vidi (IS)      | Δ                | Thread   | 0.0028   | 9.0         | Green     | Irregular surface                                     |
| Quidi Vidi (IS)      | PVC <sup>a</sup> | Thread   | *        | 3.5         | White     | Fraying                                               |
| St.Philip's (IS)     | Δ                | Sheet    | 0.0017   | 6.5         | White     | None                                                  |
| St.Philip's (IS)     | Δ                | Sheet    | 0.0011   | 9.7         | White     | None                                                  |
| St.Philip's (IS)     | Δ                | Thread   | ∅        | 8.2         | Green     | None                                                  |
| St.Philip's (IS)     | ∅                | Fibre    | ∅        | ∅           | Blue      | Fraying                                               |
| Petty Harbour (IS)   | Δ                | Fragment | 0.0010   | 4.2         | White     | Pitting, adhered particles, grooves, linear fractures |
| Petty Harbour (IS)   | Δ                | Fragment | 0.0002   | 2.0         | White     | Pitting, adhered particles, grooves, linear fractures |
| Petty Harbour (IS)   | Δ                | Fragment | 0.0018   | 2.8         | White     | Grooves, linear fractures                             |
| Witless Bay (IS)     | ABS <sup>a</sup> | Fragment | 0.0003   | 1.6         | Grey      | None                                                  |
| Witless Bay (IS)     | PET              | Fibre    | 0.0015   | 12.1        | Pink      | None                                                  |
| Bauline East (IS)    | PE               | Thread   | 0.0005   | 6.0         | Green     | Small pits, grooves                                   |
| Brigus South (OS)    | Δ                | Film     | 0.0002   | 3.4         | Green     | Discoloured, melted, frayed                           |
| Brigus South (OS)    | ∅                | Fibre    | ∅        | ∅           | Blue      | Fraying, discolouration                               |
| Halibut Channel (OS) | Δ                | Fibre    | *        | *           | Blue      | None                                                  |
| Burgeo Bank (OS)     | PE <sup>a</sup>  | Thread   | 0.6970   | 9.0         | White     | None                                                  |
| Grand Banks (OS)     | PC <sup>a</sup>  | Fragment | 0.0070   | 5.0         | Red/white | None                                                  |
| Grand Banks (OS)     | PE               | Thread   | 0.0001   | 4.0         | White     | None                                                  |
| Grand Banks (OS)     | PVC <sup>a</sup> | Fragment | 0.0010   | 3.0         | White     | Linear fractures, irregular surface, grooves          |

<sup>a</sup> suspected

\* too small to register

∅ particle lost, data could not be gathered

Δ no result

5  
 6 The masses of the plastic for which weight could be determined ( $n=14$ ), ranged from 0.0001 g to  
 7 0.6970 g, with a mean mass of 0.0510 g ( $n=14$ ,  $SD=0.190$ ; Table 4). The masses were not  
 8 recorded for 5 particles, either because they were lost prior to weighing ( $n=3$ ) or were too  
 9 lightweight to register ( $n=2$ ). The high standard deviation is attributed to the mass of one of the  
 10 particles (a large piece of rope); when this particle was removed, the mean mass of the remaining  
 11 13 particles was 0.0015 g ( $n=13$ ,  $SD=0.002$ ). The mean weight of plastic for the entire sample  
 12 population of Atlantic cod (including individuals that had not ingested plastic) is 0.0007 g per  
 13 individual ( $n=1,010$ ,  $SD=0.022$ ). Although this metric is recommended to be reported in  
 14 ingestion studies for the sake of standardization (Galgani et al., 2013), considering that only 17  
 15 cod had ingested any plastic, it is more useful here to report the mean weight of plastics among  
 16 individuals for which plastic ingestion had occurred. Of the sub-population of Atlantic cod that  
 17 had ingested plastic(s), the mean weight of plastic is 0.0420 g per individual ( $n=17$ ,  $SD=0.170$ ).

18  
 19 Nine of the particles (47%) had no discernable weathering or erosion patterns, while the rest of  
 20 particles (53%,  $n=10$ ) had various forms of weathering, including pits and grooves ( $n=5$ ),  
 21 fracturing ( $n=4$ ), adhered particles ( $n=2$ ), fraying ( $n=4$ ), discolouration ( $n=2$ ), melting ( $n=1$ ) and  
 22 irregular surface textures ( $n=2$ ) (Table 4). There was a higher proportion of particles recovered  
 23 from offshore cod that displayed considerable weathering (29%,  $n=2$ ) relative to particles from

1 inshore fish (17%,  $n=2$ ), but the frequency of occurrence of the weathered particles did not vary  
2 between offshore and inshore fish ( $p=0.510$ ,  $df=1$ ,  $n=19$ ).

3  
4 It is worth noting that three plastic particles were microfibres and the possibility of  
5 contamination needs to be addressed. Two particles were enmeshed in a conglomerate of  
6 partially digested material (Fig. 3C), eliminating the possibility of contamination via atmospheric  
7 deposition, as is common with microfibres (Fries et al., 2013; Hidalgo-Ruz et al., 2012; Nuelle et  
8 al., 2014; Woodall et al., 2015). Although the third microfibre was small enough to be  
9 atmospherically deposited, it did not match any fibres present in the control dishes and instead  
10 was embedded in a bundle of red algae. As such, we do not consider any of these microfibres to  
11 be a product of contamination.

12  
13 The following plastic polymer types were identified for particles recovered from Atlantic cod  
14 using Raman micro-spectrometry: polyethylene (PE), polyvinylchloride (PVC), polyethylene  
15 terephthalate (PET), acrylonitrile butadiene styrene (ABS), and polycarbonate (PC). For more  
16 details on spectrometry results, see S2.

17  
18  
19  
20  
21  
22  
23  
24  
25  
26  
27  
28  
29



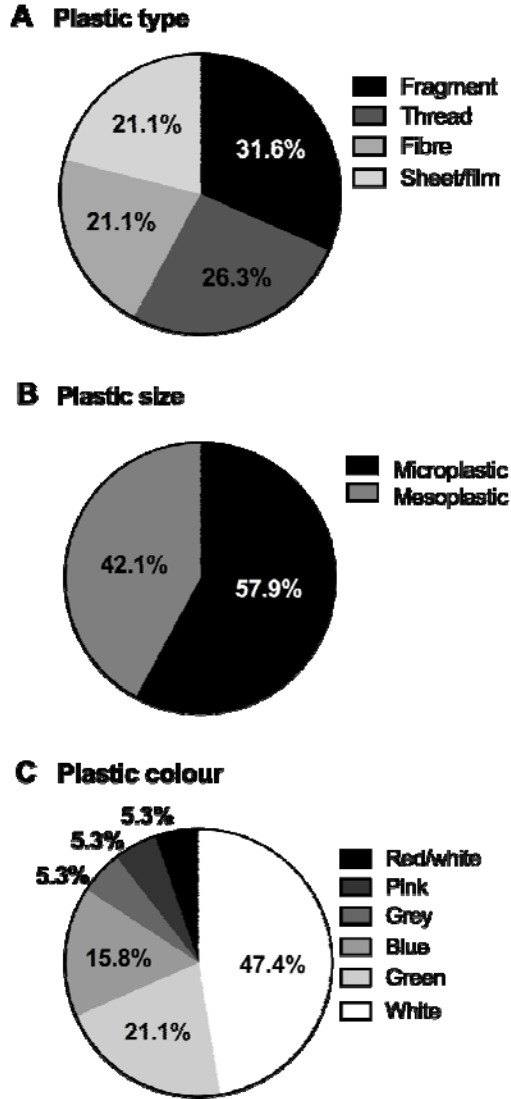

1  
2  
3  
4  
5  
6  
7  
8  
9  
10

**Fig. 2** The characteristics for plastic particles (n= 19) recovered from Atlantic cod captured in Newfoundland from 2015 to 2016 for the following: (A) plastic type, (B) plastic size, as microplastics (<5 mm) or mesoplastics (5-20 mm) and, (C) plastic colour.

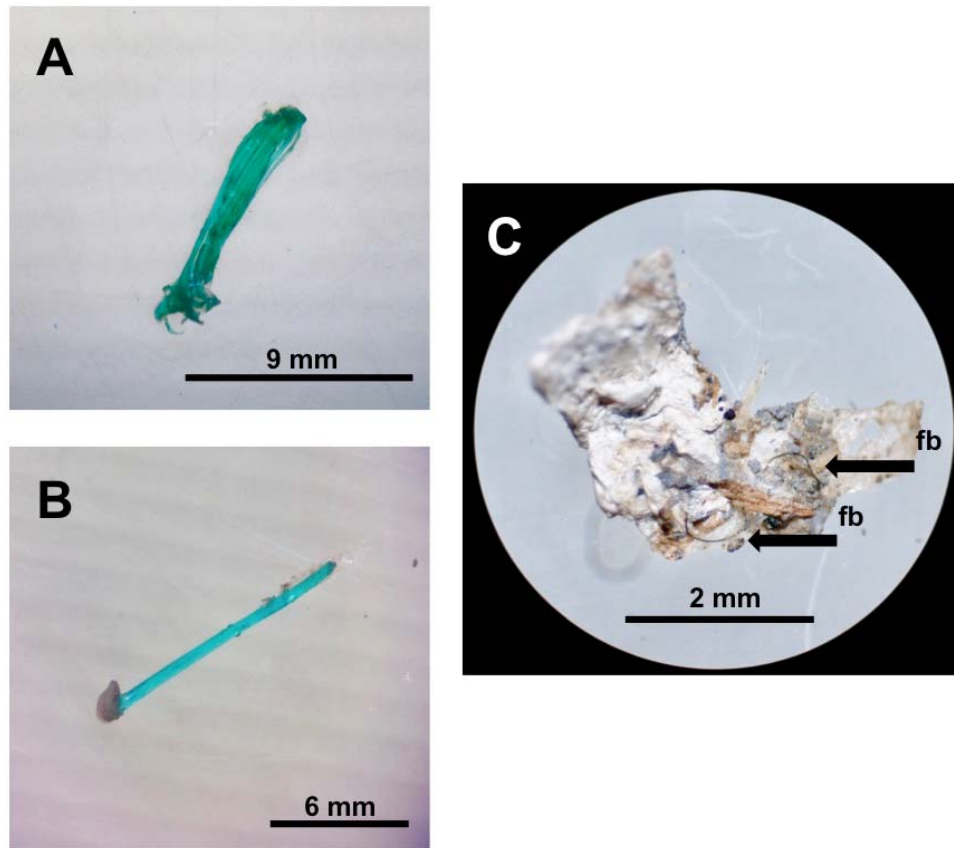

1  
2  
3 **Fig. 3** Selection of plastics found in Atlantic cod (*Gadus morhua*) collected by CSS in  
4 2015/2016: (A) green fishing line from 2015, (B) a green polyethylene fishing line thread from  
5 2016 and, (C) a fibre enmeshed in a conglomerate of partially digested material; the black arrows  
6 labeled “fb” indicate the exact location of the fibre.

## 7 Discussion

8 A total of 1.19% of studied Newfoundland food fish individuals (Atlantic cod, Atlantic salmon  
9 and capelin) were found to have ingested plastic, with an ingestion rate of 0% for capelin, 0% for  
10 Atlantic salmon, and 1.68% for Atlantic cod. The geographical range of collections was broad,  
11 and spanned both the southern and eastern coasts of the island, and northern Labrador (Davis  
12 Strait). Atlantic cod is a culturally and economically important species on the island of  
13 Newfoundland. In total, 17 individual cod ingested at least one plastic particle.

14  
15 The majority (58%) of ingested plastics were microplastics (1-5 mm) and the remainder were  
16 mesoplastics between 5 mm and 10 mm in size. This is at first a surprising result considering that  
17 microplastics are expected to be the most common neuston marine plastic by number (Eriksen et  
18 al., 2014), and plastics ingested by fish are often dominated by the microplastic size class  
19 (Foekema et al., 2013; Lusher et al., 2016, 2013; Murphy et al., 2017; Neves et al., 2015; Peters

1 et al., 2017). Yet in previous studies, both Bråte et al. (2016) and Rummel et al. (2016) used  
2 identical methods to ours to identify plastics in Atlantic cod and in both cases, plastics greater  
3 than 5 mm in size were present in the highest proportion.

4  
5 Half of all ingested particles showed no weathering, and in several particles weathering was  
6 minimal. There seemed to be no difference of weathering condition in particles recovered from  
7 individuals collected offshore when compared to inshore fish. Particle colours were often fresh  
8 and bright, fragments had sharp edges, and most fibres were minimally frayed. This lack of  
9 weathering is indicative of short residence times in the ocean, which may point toward a local  
10 source (Endo et al., 2005; Liboiron et al., 2016).

11  
12 Green threads were recovered in Atlantic cod from both sampling years (Fig. 3). This particular  
13 shade of green is common in the fishing industry's most common fishing gear: polyethylene,  
14 polypropylene, and polysteel ropes and threads (Knowlton et al., 2016; Murray and Cowie, 2011;  
15 Nedostup and Orlov, 2010; Turner, 2016). The green thread recovered from an Atlantic cod  
16 individual in 2016 was confirmed by Raman micro-spectrometry to be polyethylene and green  
17 was the second most common colour of particles recovered from cod in this research.

18  
19 All polymers identified in Raman spectrometry ( $n=8$ ) were of a higher density than seawater,  
20 except polyethylene (Table 4). A density greater than that of seawater likely leads to the  
21 movement of these high density particles from the surface of water to the benthos (Browne et al.,  
22 2010; Claessens et al., 2011; Nuelle et al., 2014), placing them in the feeding zone of  
23 benthopelagic feeders such as Atlantic cod. Polyethylene was the most commonly identified  
24 polymer and is ubiquitously used in the production of fishing gear. Polyethylene in its pristine  
25 form is buoyant in seawater (Turner, 2016), though biofouling or ingestion by vertically  
26 migrating species can transport this material to greater depths (Lusher et al., 2013; Ye and  
27 Andrady, 1991).

28  
29 Plastics ingestion by Atlantic cod has been examined over a wide geographic region beyond this  
30 study, with a particular focus on the Northeast Atlantic. These published results have been highly  
31 variable. Rummel et al. (2016) and Bråte et al. (2016) report %FO values of  $\leq 3\%$  for Atlantic  
32 cod in the North, Baltic and Norwegian seas. By contrast, earlier studies reported higher %FO  
33 values for Atlantic cod in the same region; ranging from 13% (Foekema et al., 2013) to 39%  
34 (Lenz et al., 2015a) in the North Sea, and 21% in the Baltic Sea (Lenz et al., 2015a). Low plastic  
35 ingestion levels reported for Atlantic cod ( $<3\%$ FO) that are comparable to the results reported  
36 here stem from studies that similarly rely on the visual identification of plastics (Bråte et al.,  
37 2016; Rummel et al., 2016). Meanwhile, reports of relatively high plastic ingestion levels in  
38 Atlantic cod ( $>10\%$  FO) have stemmed from studies that employ acid digestion of digestive  
39 contents and can identify plastics  $< 1$  mm in size (Foekema et al., 2013; Lenz et al., 2015a), thus  
40 increasing the size range of identifiable plastics and the resultant %FO for the sample population.  
41 Acid digestion protocols are not suitable to the long-term monitoring developed by CLEAR for  
42 its inaccessibility to citizen scientists, and so are not used in this study (see Liboiron et al., 2016).

43  
44 The wide range of sample sizes may also explain the wide range of %FO values reported for  
45 Atlantic cod. Outside of this research, sample sizes for Atlantic cod plastic ingestion research  
46 range from 7 (Rummel et al., 2016) to 302 (Bråte et al., 2016) individuals. The ideal minimum

1 sample size for plastic ingestion studies is species specific and depends on the %FO for that  
2 species (larger sample size required for species exhibiting a lower %FO), as well as any  
3 interannual variability in that average and whether the purpose of the research is to detect  
4 changes over time (Provencher et al., 2016; van Franeker and Meijboom, 2002). There is not yet  
5 enough records of plastic ingestion in Atlantic cod across various sample sizes to conduct an  
6 analysis of the species dataset and determine at which sample size the variance in reported %FO  
7 decreases, as described by van Franeker and Meijboom (2002).

8  
9 To our knowledge, this is the first published study that examines plastic ingestion by Atlantic  
10 salmon. The majority of salmon examined in our study (84%) were collected within the  
11 Newfoundland summer recreational fishing season (Fisheries and Oceans Canada, 2015). During  
12 this period, Atlantic salmon return from the ocean to spawn in freshwater rivers in  
13 Newfoundland (Porter, 1975). It is possible that individuals were not actively feeding during this  
14 time - indeed, only a small proportion (20%) of individuals collected in this study had food in  
15 their stomach. A previous study found 1 plastic in 4 individual Chinook salmon destined for  
16 human consumption in California, USA, for a %FO of 25%, though the sample size is too low to  
17 generalize for the species (Rochman et al., 2015). Ingestion studies on the zooplankton that are  
18 food sources for salmon speculated that secondary ingestion of microfibers would be widespread  
19 in salmon (Desforges et al., 2015). It is not clear whether these studies are comparable to this  
20 one, as the species, methods, and locations are different.

21  
22 Similar to Atlantic salmon, this is the first study of plastic ingestion by capelin. Sampling of  
23 capelin for this study was also restricted to the summer when capelin are subject to human  
24 consumption during their spawning period (Lilly, 1987). Similar to Atlantic salmon, the  
25 proportion of fed individuals collected in this study was relatively low (37%). The human  
26 consumption of capelin may be of particular interest considering that the species is often  
27 consumed whole (MacDonald, 2016; Over, 2003).

28  
29 The 0% ingestion rate in capelin and Atlantic salmon mirror a null rate in Silver hake in the  
30 region of southern Newfoundland, as well as 41% of all fish species reported in English-  
31 language scientific literature (Liboiron et al., 2018). While the null rate may be due to the species  
32 spawning behavior, it may be part of a broader trend.

33  
34 Geographically, sampling was relatively broad, however, the west and north coasts of  
35 Newfoundland as well as coast of Labrador were not examined in this study. Future monitoring  
36 of plastics in important food fish species should address these regions.

### 37 *Acknowledgements*

38 We acknowledge that this research was conducted on the ancestral Lands of the Mi'kmaq and  
39 Beothuk peoples. We would also like to acknowledge the Inuit of Nunatsiavut and NunatuKavut  
40 and the Innu of Nitassinan, and their ancestors, as the original peoples of Labrador.

41 We would like to acknowledge Fisheries and Oceans Canada and the Fisheries and Marine  
42 Institute of Memorial University for providing the offshore survey samples. We would like to  
43 extend our appreciation to the Merschod Lab for help with Raman Spectrometry. We would also  
44 like to thank all of the commercial and recreational fishermen who invited us to participate in  
45 their filleting process for the donation of samples. For the salmon donations we would like to

1 thank: Dr. Martha Robertson (DFO), Kristin Bøe, Jacqueline Chapman, Robert Lennox and the  
2 Cooke Lab. For cod and capelin collections we extend our appreciation to: Centre for Fisheries  
3 Ecosystems Research, the crew of the *RV Celtic Explorer*, Susan Fudge, Laura Wheeland and the  
4 Government of Newfoundland and Labrador- Fisheries and Land Resources. Finally, we extend  
5 special thanks to Coco Coyle and Claudine Metcalf for helping collect and process samples.  
6 This this work is based on Masters theses by Jessica Melvin (2017) and Natalie Richárd  
7 (forthcoming).

## 8 References

- 9 Auditor General of Newfoundland and Labrador, 2014. Waste management strategy (Annual  
10 Report, part 3.4).
- 11 Avery-Gomm, S., Valliant, M., Schacter, C.R., Robbins, K.F., Liboiron, M., Daoust, P-Y., Rios,  
12 L.M., Jones, I.L., 2016. A study of wrecked Dovekies (*Alle alle*) in the western North  
13 Atlantic highlights the importance of using standardized methods to quantify plastic  
14 ingestion. *Mar. Pollut. Bull.* 113, 75–80. <https://doi.org/10.1016/j.marpolbul.2016.08.062>
- 15 Barnes, D.K.A., Galgani, F., Thompson, R.C., Barlaz, M., 2009. Accumulation and  
16 fragmentation of plastic debris in global environments. *Philos. Trans. R. Soc. B Biol. Sci.*  
17 364, 1985–1998. <https://doi.org/10.1098/rstb.2008.0205>
- 18 Bergmann, M., Lutz, B., Tekman, M.B., Gutow, L., 2017. Citizen scientists reveal: Marine litter  
19 pollutes Arctic beaches and affects wild life. *Mar. Pollut. Bull.* 125, 535–540.  
20 <https://doi.org/10.1016/j.marpolbul.2017.09.055>
- 21 Bråte, I.L.N., Eidsvoll, D.P., Steindal, C.C., Thomas, K.V., 2016. Plastic ingestion by Atlantic  
22 cod (*Gadus morhua*) from the Norwegian coast. *Mar. Pollut. Bull.* 112, 105–110.  
23 <https://doi.org/10.1016/j.marpolbul.2016.08.034>
- 24 Browne, M.A., Galloway, T.S., Thompson, R.C., 2010. Spatial patterns of plastic debris along  
25 estuarine shorelines. *Environ. Sci. Technol.* 44, 3404–3409.  
26 <https://doi.org/10.1021/es903784e>
- 27 Browne, M. A., Niven, S. J., Galloway, T. S., Rowland, S. J., & Thompson, R. C., 2013.  
28 Microplastic moves pollutants and additives to worms, reducing functions linked to  
29 health and biodiversity. *Current Biology*, 23(23), 2388-2392.  
30 <https://doi.org/10.1016/j.cub.2013.10.012>
- 31 Canadian Association of Petroleum Producers, 2017. Exploration drilling in Atlantic Canada  
32 offshore (Publication No. 2017-0047).
- 33 Canadian Association of Petroleum Producers, 2016. Canada’s offshore oil and natural gas  
34 industry in Newfoundland and Labrador (Publication No. 2016-0013).
- 35 Cannon, S.M.E., Lavers, J.L., Figueiredo, B., 2016. Plastic ingestion by fish in the Southern  
36 Hemisphere: A baseline study and review of methods. *Mar. Pollut. Bull.* 107, 286–291.  
37 <https://doi.org/10.1016/j.marpolbul.2016.03.057>
- 38 Claessens, M., De Meester, S., Van Landuyt, L., De Clerck, K., Janssen, C.R., 2011. Occurrence  
39 and distribution of microplastics in marine sediments along the Belgian coast. *Mar.*  
40 *Pollut. Bull.* 62, 2199–2204. <https://doi.org/10.1016/j.marpolbul.2011.06.030>
- 41 Colborn, T., vom Saal, F.S., Soto, A.M., 1994. Developmental effects of endocrine-disrupting  
42 chemicals in wildlife and humans. *Environ. Impact Assess. Rev.* 14, 469–489.  
43 [https://doi.org/10.1016/0195-9255\(94\)90014-0](https://doi.org/10.1016/0195-9255(94)90014-0)



- 1 Cole, M., Lindeque, P., Halsband, C., Galloway, T.S., 2011. Microplastics as contaminants in the  
2 marine environment: A review. *Mar. Pollut. Bull.* 62, 2588–2597.  
3 <https://doi.org/10.1016/j.marpolbul.2011.09.025>
- 4 Corcoran, P.L., Biesinger, M.C., Grifi, M., 2009. Plastics and beaches: A degrading relationship.  
5 *Mar. Pollut. Bull.* 58, 80–84. <https://doi.org/10.1016/j.marpolbul.2008.08.022>
- 6 Cózar, A., Echevarría, F., González-Gordillo, J.I., Irigoien, X., Úbeda, B., Hernández-León, S.,  
7 Palma, Á.T., Navarro, S., García-de-Lomas, J., Ruiz, A., Fernández-de-Puelles, M.L.,  
8 Duarte, C.M., 2014. Plastic debris in the open ocean. *Proc. Natl. Acad. Sci.* 111, 10239–  
9 10244. <https://doi.org/10.1073/pnas.1314705111>
- 10 Davison, P., Asch, R.G., 2011. Plastic ingestion by mesopelagic fishes in the North Pacific  
11 Subtropical Gyre. *Mar. Ecol. Prog. Ser.* 432, 173–180.  
12 <https://doi.org/10.3354/meps09142>
- 13 Desforges, J.-P.W., Galbraith, M., Ross, P.S., 2015. Ingestion of microplastics by zooplankton in  
14 the northeast Pacific Ocean. *Arch. Environ. Contam. Toxicol.* 69, 320–330.  
15 <https://doi.org/10.1007/s00244-015-0172-5>
- 16 Downton, P.R., Reddin, D.G., Johnson, R.W., 2001. Status of Atlantic salmon (*Salmo salar* L.)  
17 in Campbellton River, Notre Dame Bay (SFA 4), Newfoundland in 2000 (Research  
18 Document No. 2001/031). Canadian Science Advisory Secretariat, St. John's, Canada.
- 19 Endo, S., Takizawa, R., Okuda, K., Takada, H., Chiba, K., Kanehiro, H., Ogi, H., Yamashita, R.,  
20 Date, T., 2005. Concentration of polychlorinated biphenyls (PCBs) in beached resin  
21 pellets: Variability among individual particles and regional differences. *Mar. Pollut. Bull.*  
22 50, 1103–1114. <https://doi.org/10.1016/j.marpolbul.2005.04.030>
- 23 Engler, R.E., 2012. The complex interaction between marine debris and toxic chemicals in the  
24 ocean. *Environ. Sci. Technol.* 46, 12302–12315. <https://doi.org/10.1021/es3027105>
- 25 Eriksen, M., Lebreton, L.C.M., Carson, H.S., Thiel, M., Moore, C.J., Borrorro, J.C., Galgani, F.,  
26 Ryan, P.G., Reisser, J., 2014. Plastic pollution in the world's oceans: More than 5 trillion  
27 plastic pieces weighing over 250,000 tons afloat at sea. *PLOS ONE* 9, e111913.  
28 <https://doi.org/10.1371/journal.pone.0111913>
- 29 Eriksson, C., Burton, H., 2003. Origins and biological accumulation of small plastic particles in  
30 fur seals from Macquarie Island. *Ambio* 32, 380–384.
- 31 ESRI, 2014. ArcGIS Desktop Software. Redlands, California, USA.
- 32 Fisheries and Land Resources, 2017. Newfoundland and Labrador fishing industry highlights  
33 2015 (revised) and 2016 (preliminary).
- 34 Fisheries and Oceans Canada, 2017a. Canada's fisheries fast facts 2016 (No. Fs1-75E-PDF),  
35 Statistical and Economics Analysis Series (SEAS). Ottawa.
- 36 Fisheries and Oceans Canada, 2017b. Landings and Landed Value by Species: Newfoundland  
37 and Labrador region. Department of Fisheries and Oceans Canada. Retrieved from  
38 [http://www.nfl.dfo-](http://www.nfl.dfo-mpo.gc.ca/publications/reports_rapports/Land_All_Vessels_Debarquer_Tous_Les_Navires_2016_eng.htm)  
39 [mpo.gc.ca/publications/reports\\_rapports/Land\\_All\\_Vessels\\_Debarquer\\_Tous\\_Les\\_Navires\\_2016\\_eng.htm](http://www.nfl.dfo-mpo.gc.ca/publications/reports_rapports/Land_All_Vessels_Debarquer_Tous_Les_Navires_2016_eng.htm)
- 40
- 41 Fisheries and Oceans Canada, 2015. 2015-2016 angler's guide (No. DFO/2015-1949). St. John's,  
42 Canada.
- 43 Fisheries and Oceans Canada, 2012a. Survey of recreational fishing in Canada, 2010 (No.  
44 DFO/2012-1804). Government of Canada, Ottawa.
- 45 Fisheries and Oceans Canada, 2012b. Results and recommendations from the ecosystem research  
46 initiative - Newfoundland and Labrador's expanded research on ecosystem relevant but



- 1 under surveyed splicers (Science Advisory Report No. 2012/058). Canadian Science  
2 Advisory Secretariat, St. John's, Canada.
- 3 Fisheries and Oceans Statistical Services, 2016. Canada's Fisheries Fast Facts 2015. Department  
4 of Fisheries and Oceans Canada. Retrieved from [http://www.dfo-mpo.gc.ca/stats/facts-](http://www.dfo-mpo.gc.ca/stats/facts-Info-15-eng.htm)  
5 [Info-15-eng.htm](http://www.dfo-mpo.gc.ca/stats/facts-Info-15-eng.htm)
- 6 Foekema, E.M., De Gruijter, C., Mergia, M.T., van Franeker, J.A., Murk, A.J., Koelmans, A.A.,  
7 2013. Plastic in North Sea fish. *Environ. Sci. Technol.* 47, 8818–8824.  
8 <https://doi.org/10.1021/es400931b>
- 9 Fries, E., Dekiff, J.H., Willmeyer, J., Nuelle, M-T., Ebert, M., Remy, D., 2013. Identification of  
10 polymer types and additives in marine microplastic particles using pyrolysis-GC/MS and  
11 scanning electron microscopy. *Environ. Sci. Process. Impacts* 15, 1949–1956.  
12 <https://doi.org/10.1039/C3EM00214D>
- 13 Galgani, F., Hanke, G., Werner, S., Oosterbaan, L., Nilsson, P., Fleet, D., Kinsey, S., Thompson,  
14 R., Andreja, P., Van Franeker, J.A., Vlachogianni, T., Scoullou, T., Veiga, M., Matiddi,  
15 M., Alcaro, L., Maes, T., Korpinen, S., Budziak, A., Leslie, H., Gago, J., Liebezeit, G.,  
16 2013. Guidance on monitoring of marine litter in European seas (No. JRC83985), JRC  
17 Scientific and Policy Reports. Joint Research Centre of the European Commission,  
18 Luxembourg.
- 19 GESAMP, 2015. Sources, fate and effects of microplastics in the marine environment: A global  
20 assessment (Rep. Stud. GESAMP No. 90). IMO/FAO/UNESCO-  
21 IOC/UNIDO/WMO/IAEA/UN/UNEP/UNDP Joint Group of Experts on the Scientific  
22 Aspects of Marine Environmental Protection, Exeter (UK).
- 23 Government of Canada, 2017. 2017 Newfoundland and Labrador Recreational Groundfish  
24 Fishery. Department of Fisheries and Oceans Canada. Retrieved from [http://www.dfo-](http://www.dfo-mpo.gc.ca/decisions/fm-2017-gp/atl-06-eng.htm)  
25 [mpo.gc.ca/decisions/fm-2017-gp/atl-06-eng.htm](http://www.dfo-mpo.gc.ca/decisions/fm-2017-gp/atl-06-eng.htm).
- 26 Government of Newfoundland and Labrador, 2017. Solid waste management strategy:  
27 Performance monitoring report. Department of Municipal Affairs, Newfoundland and  
28 Labrador, Canada.
- 29 Henemen, B., 1988. Persistent marine debris in the North Sea, northwest Atlantic Ocean, wider  
30 Caribbean area, and the west coast of Baja California, A Report to the Marine Mammal  
31 Commission and the National Ocean Pollution Program Office, National Oceanic and  
32 Atmospheric Administration, U.S. Department of Commerce. Center for Environmental  
33 Education.
- 34 Hidalgo-Ruz, V., Gutow, L., Thompson, R.C., Thiel, M., 2012. Microplastics in the marine  
35 environment: A review of the methods used for identification and quantification.  
36 *Environ. Sci. Technol.* 46, 3060–3075. <https://doi.org/10.1021/es2031505>
- 37 Hopewell, J., Dvorak, R., Kosior, E., 2009. Plastics recycling: challenges and opportunities.  
38 *Philos. Trans. R. Soc. B Biol. Sci.* 364, 2115–2126.  
39 <https://doi.org/10.1098/rstb.2008.0311>
- 40 Jabeen, K., Su, L., Li, J., Yang, D., Tong, C., Mu, J., Shi, H., 2017. Microplastics and  
41 mesoplastics in fish from coastal and fresh waters of China. *Environ. Pollut.* 221, 141–  
42 149. <https://doi.org/10.1016/j.envpol.2016.11.055>
- 43 Kim, E-J., Kim, J-W., Lee, S.-K., 2002. Inhibition of oocyte development in Japanese medaka  
44 (*Oryzias latipes*) exposed to di-2-ethylhexyl phthalate. *Environ. Int.* 28, 359–365.  
45 [https://doi.org/10.1016/S0160-4120\(02\)00058-2](https://doi.org/10.1016/S0160-4120(02)00058-2)

- 1 Knowlton, A.R., Robbins, J., Landry, S., McKenna, H.A., Kraus, S.D., Werner, T.B., 2016.  
2 Effects of fishing rope strength on the severity of large whale entanglements. *Conserv.*  
3 *Biol.* 30, 318–328. <https://doi.org/10.1111/cobi.12590>
- 4 Koelmans, A. A., Bakir, A., Burton, G. A., & Janssen, C. R., 2016. Microplastic as a vector for  
5 chemicals in the aquatic environment: critical review and model-supported  
6 reinterpretation of empirical studies. *Environmental science & technology*, 50, 3315-  
7 3326. <http://doi.org/10.1021/acs.est.5b06069>
- 8 Lang, I.A., Galloway, T.S., Scarlett, A., Henley, W.E., Depledge, M., Wallace, R.B., Melzer, D.,  
9 2008. Association of urinary bisphenol A concentration with medical disorders and  
10 laboratory abnormalities in adults. *JAMA* 300, 1303–1310.  
11 <https://doi.org/10.1001/jama.300.11.1303>
- 12 Lavers, J.L., Bond, A.L., 2017. Exceptional and rapid accumulation of anthropogenic debris on  
13 one of the world’s most remote and pristine islands. *Proc. Natl. Acad. Sci.* 114, 6052–  
14 6055. <https://doi.org/10.1073/pnas.1619818114>
- 15 Lenz, R., Enders, K., Beer, S., Sørensen, T.K., Stedmon, C.A., 2015a. Analysis of microplastic  
16 in the stomachs of herring and cod from the North Sea and Baltic Sea (Technical Report).  
17 DTU Aqua, National Institute of Aquatic Resources, Denmark.
- 18 Lenz, R., Enders, K., Stedmon, C.A., Mackenzie, D.M.A., Nielsen, T.G., 2015b. A critical  
19 assessment of visual identification of marine microplastic using Raman spectroscopy for  
20 analysis improvement. *Mar. Pollut. Bull.* 100, 82–91.  
21 <https://doi.org/10.1016/j.marpolbul.2015.09.026>
- 22 Liboiron, F., Ammendolia, J., Saturno, J., Melvin, J., Zahara, A., Richárd, N., & Liboiron, M.,  
23 2018. A zero percent plastic ingestion rate by silver hake (*Merluccius bilinearis*) from the  
24 south coast of Newfoundland, Canada. *Marine Pollution Bulletin*, 131, 267-275.  
25 <https://doi.org/10.1016/j.marpolbul.2018.04.007>
- 26 Liboiron, M., Liboiron, F., Wells, E., Richard, N., Zahara, A., Mather, C., Bradshaw, H.,  
27 Murichi, J., 2016. Low plastic ingestion rate in Atlantic cod (*Gadus morhua*) from  
28 Newfoundland destined for human consumption collected through citizen science  
29 methods. *Mar. Pollut. Bull.* 113, 428–437.  
30 <https://doi.org/10.1016/j.marpolbul.2016.10.043>
- 31 Lilly, G.R., 1987. Interactions between Atlantic cod (*Gadus morhua*) and capelin (*Mallotus*  
32 *villosus*) off Labrador and eastern Newfoundland: A review, Canadian Technical Report  
33 of Fisheries and Aquatic Sciences No. 1567. DFO, St. John’s, NL.
- 34 Lithner, D., Nordensvan, I., Dave, G., 2012. Comparative acute toxicity of leachates from plastic  
35 products made of polypropylene, polyethylene, PVC, acrylonitrile–butadiene–styrene,  
36 and epoxy to *Daphnia magna*. *Environ. Sci. Pollut. Res.* 19, 1763–1772.  
37 <https://doi.org/10.1007/s11356-011-0663-5>
- 38 Löder, M., Gerdt, G., 2015. Methodology used for the detection and identification of  
39 microplastics: a critical appraisal, in: *Marine Anthropogenic Litter*. Springer,  
40 Switzerland, pp. 201–227.
- 41 Lowitt, K., 2013. Examining fisheries contributions to community food security: Findings from a  
42 household seafood consumption survey on the west coast of Newfoundland. *J. Hunger*  
43 *Environ. Nutr.* 8, 221–241. <https://doi.org/10.1080/19320248.2013.786668>
- 44 Lusher, A.L., McHugh, M., Thompson, R.C., 2013. Occurrence of microplastics in the  
45 gastrointestinal tract of pelagic and demersal fish from the English Channel. *Mar. Pollut.*  
46 *Bull.* 67, 94–99. <https://doi.org/10.1016/j.marpolbul.2012.11.028>

- 1 Lusher, A.L., O'Donnell, C., Officer, R., O'Connor, I., 2016. Microplastic interactions with  
2 North Atlantic mesopelagic fish. *ICES J. Mar. Sci.* 73, 1214–1225.  
3 <https://doi.org/10.1093/icesjms/fsv241>
- 4 MacDonald, M., 2016. Unusual “capelin roll” attracts thousands to rocky beaches in N.L.” Can.  
5 Press.
- 6 Mallory, M.L., 2008. Marine plastic debris in northern fulmars from the Canadian high Arctic.  
7 *Mar. Pollut. Bull.* 56, 1501–1504. <https://doi.org/10.1016/j.marpolbul.2008.04.017>
- 8 Marine Institute (Foras na Mara), n.d. National research vessel Celtic Explorer: Technical  
9 specifications [Brochure]. Research Vessels Operations, Oranmore, Co. Galway, IE.
- 10 Mato, Y., Isobe, T., Takada, H., Kanehiro, H., Ohtake, C., Kaminuma, T., 2001. Plastic resin  
11 pellets as a transport medium for toxic chemicals in the marine environment. *Environ.*  
12 *Sci. Technol.* 35, 318–324. <https://doi.org/10.1021/es0010498>
- 13 McWilliams, M., Liboiron, M., Wiersma, Y., 2017. Rocky shoreline protocols miss  
14 microplastics in marine debris surveys (Fogo Island, Newfoundland and Labrador). *Mar.*  
15 *Pollut. Bull.* Advance online publication. <https://doi.org/10.1016/j.marpolbul.2017.10.018>
- 16 Meikle, J.L., 1997. Material doubts: the consequences of plastic. *Environ. Hist.* 2, 278–300.  
17 <https://doi.org/10.2307/3985351>
- 18 Melvin, J., 2017. Plastic ingestion in Atlantic cod (*Gadus morhua*) on the east coast of  
19 Newfoundland, Canada: results from a citizen science monitoring project, with policy  
20 recommendations for long-term monitoring. Master's Thesis. University of Akureyri,  
21 Ísafjörður.
- 22 Melzer, D., Rice, N.E., Lewis, C., Henley, W.E., Galloway, T.S., 2010. Association of urinary  
23 bisphenol A concentration with heart disease: Evidence from NHANES 2003/06. *PLoS*  
24 *ONE* 5. <https://doi.org/10.1371/journal.pone.0008673>
- 25 Multi-Materials Stewardship Board, 2016. Newfoundland and Labrador provincial litter audit.
- 26 Murphy, F., Russell, M., Ewins, C., Quinn, B., 2017. The uptake of macroplastic & microplastic  
27 by demersal & pelagic fish in the Northeast Atlantic around Scotland. *Mar. Pollut. Bull.*  
28 122, 353–359. <https://doi.org/10.1016/j.marpolbul.2017.06.073>
- 29 Murray, F., Cowie, P.R., 2011. Plastic contamination in the decapod crustacean *Nephrops*  
30 *norvegicus* (Linnaeus, 1758). *Mar. Pollut. Bull.* 62, 1207–1217.  
31 <https://doi.org/10.1016/j.marpolbul.2011.03.032>
- 32 Nedostup, A.A., Orlov, E.K., 2010. Study of the static coefficient of friction of fishing cordage  
33 on a friction gear drum. *J. Frict. Wear* 31, 301–307.  
34 <https://doi.org/10.3103/S1068366610040094>
- 35 Neves, D., Sobral, P., Ferreira, J.L., Pereira, T., 2015. Ingestion of microplastics by commercial  
36 fish off the Portuguese coast. *Mar. Pollut. Bull.* 101, 119–126.  
37 <https://doi.org/10.1016/j.marpolbul.2015.11.008>
- 38 Nuelle, M.-T., Dekiff, J.H., Remy, D., Fries, E., 2014. A new analytical approach for monitoring  
39 microplastics in marine sediments. *Environ. Pollut.* 184, 161–169.  
40 <https://doi.org/10.1016/j.envpol.2013.07.027>
- 41 Ochi, D., 2009. Transport and release of chemicals from plastics to the environment and to  
42 wildlife. *Philosophical Transactions of the Royal Society of London B: Biological*  
43 *Sciences*, 364, 2027–2045. <http://doi.org/10.1098/rstb.2008.0284>
- 44 Over, J., 2003. The Newfoundland and Labrador seafood cookbook. Breakwater Books, St.  
45 John's, NL.

- 1 Peters, C.A., Thomas, P.A., Rieper, K.B., Bratton, S.P., 2017. Foraging preferences influence  
2 microplastic ingestion by six marine fish species from the Texas Gulf Coast. *Mar. Pollut.*  
3 *Bull.* <https://doi.org/10.1016/j.marpolbul.2017.06.080>
- 4 Plastics Europe, 2016. *Plastics - the facts 2016: An analysis of European plastics production,*  
5 *demand and waste data.*
- 6 Poon, F.E., Provencher, J.F., Mallory, M.L., Braune, B.M., Smith, P.A., 2017. Levels of ingested  
7 debris vary across species in Canadian Arctic seabirds. *Mar. Pollut. Bull.* 116, 517–520.  
8 <https://doi.org/10.1016/j.marpolbul.2016.11.051>
- 9 Porter, T.R., 1975. *Biology of Atlantic salmon in Newfoundland and Labrador (No. NEW/N-75-*  
10 *2), Information Report Series. Department of the Environment, Fisheries and Marine*  
11 *Service, Newfoundland region.*
- 12 Prism, Graphpad, 2016. *GraphPad Software. La Jolla, California, USA.*
- 13 Provencher, J.F., Bond, A.L., Avery-Gomm, S., Borrelle, S.B., Rebolledo, E.L.B., Hammer, S.,  
14 Kühn, S., Lavers, J.L., Mallory, M.L., Trevail, A., Franeker, J.A. van, 2016. Quantifying  
15 ingested debris in marine megafauna: A review and recommendations for  
16 standardization. *Anal. Methods.* <https://doi.org/10.1039/C6AY02419J>
- 17 Rochman, C.M., Tahir, A., Williams, S.L., Baxa, D.V., Lam, R., Miller, J.T., Teh, F-C.,  
18 Werorilangi, S., Teh, S.J., 2015. Anthropogenic debris in seafood: Plastic debris and  
19 fibers from textiles in fish and bivalves sold for human consumption. *Sci. Rep.* 5, 14340.  
20 <https://doi.org/10.1038/srep14340>
- 21 Rochman, C. M., Hoh, E., Kurobe, T., & Teh, S. J., 2013. Ingested plastic transfers hazardous  
22 chemicals to fish and induces hepatic stress. *Scientific reports* 3, 3263. [http://](http://doi:10.1038/srep03263)  
23 [doi:10.1038/srep03263](http://doi:10.1038/srep03263)
- 24 Romeo, T., Pietro, B., Pedà, C., Consoli, P., Andaloro, F., Fossi, M.C., 2015. First evidence of  
25 presence of plastic debris in stomach of large pelagic fish in the Mediterranean Sea. *Mar.*  
26 *Pollut. Bull.* 95, 358–361. <https://doi.org/10.1016/j.marpolbul.2015.04.048>
- 27 Rummel, C.D., Löder, M.G.J., Fricke, N.F., Lang, T., Griebeler, E-M., Janke, M., Gerdts, G.,  
28 2016. Plastic ingestion by pelagic and demersal fish from the North Sea and Baltic Sea.  
29 *Mar. Pollut. Bull.* 102, 134–141. <https://doi.org/10.1016/j.marpolbul.2015.11.043>
- 30 Shepard, P.M., Northridge, M.E., Prakash, S., Stover, G., 2002. Preface: Advancing  
31 environmental justice through community-based participatory research. *Environ. Health*  
32 *Perspect.* 110, 139–140.
- 33 Silva-Cavalcanti, J.S., Silva, J.D.B., França, E.J. de, Araújo, M.C.B. de, Gusmão, F., 2017.  
34 Microplastics ingestion by a common tropical freshwater fishing resource. *Environ.*  
35 *Pollut.* 221, 218–226. <https://doi.org/10.1016/j.envpol.2016.11.068>
- 36 Song, Y.K., Hong, S.H., Jang, M., Han, G.M., Rani, M., Lee, J., Shim, W.J., 2015. A comparison  
37 of microscopic and spectroscopic identification methods for analysis of microplastics in  
38 environmental samples. *Mar. Pollut. Bull.* 93, 202–209.  
39 <https://doi.org/10.1016/j.marpolbul.2015.01.015>
- 40 Statistics Canada, 2012. *Newfoundland and Labrador - Focus on geography series - 2011 census.*  
41 Retrieved from [http://www12.statcan.gc.ca/census-recensement/2011/as-sa/fogs-](http://www12.statcan.gc.ca/census-recensement/2011/as-sa/fogs-spg/Facts-pr-eng.cfm?Lang=Eng&GC=10)  
42 [spg/Facts-pr-eng.cfm?Lang=Eng&GC=10](http://www12.statcan.gc.ca/census-recensement/2011/as-sa/fogs-spg/Facts-pr-eng.cfm?Lang=Eng&GC=10) (accessed 12.1.16).
- 43 Teuten, E.L., Saquing, J.M., Knappe, D.R.U., Barlaz, M.A., Jonsson, S., Björn, A., Rowland,  
44 S.J., Thompson, R.C., Galloway, T.S., Yamashita, R., Ochi, D., Watanuki, Y., Moore, C.,  
45 Viet, P.H., Tana, T.S., Prudente, M., Boonyatumanond, R., Zakaria, M.P., Akkhavong,  
46 K., Ogata, Y., Hirai, H., Iwasa, S., Mizukawa, K., Hagino, Y., Imamura, A., Saha, M.,

- 1 Takada, H., 2009. Transport and release of chemicals from plastics to the environment  
2 and to wildlife. *Philos. Trans. R. Soc. B Biol. Sci.* 364, 2027–2045.  
3 <https://doi.org/10.1098/rstb.2008.0284>
- 4 The St. Lawrence Seaway Management Corporation, 2016. Innovation at work, annual corporate  
5 summary 2015-2016.
- 6 Thompson, R.C., Olsen, Y., Mitchell, R.P., Davis, A., Rowland, S.J., John, A.W.G., McGonigle,  
7 D., Russell, A.E., 2004. Lost at sea: Where is all the plastic? *Science* 304, 838–838.  
8 <https://doi.org/10.1126/science.1094559>
- 9 Turner, A., 2016. Trace elements in fragments of fishing net and other filamentous plastic litter  
10 from two beaches in SW England. *Environ. Pollut.* 224, 722–728.  
11 <https://doi.org/10.1016/j.envpol.2016.11.034>
- 12 UNEP, 2009. Marine litter: A global challenge. UNEP, Nairobi.
- 13 van Franeker, J.A., Blaize, C., Danielsen, J., Fairclough, K., Gollan, J., Guse, N., Hansen, P.-L.,  
14 Heubeck, M., Jensen, J.-K., Le Guillou, G., Olsen, B., Olsen, K.-O., Pedersen, J., Stienen,  
15 E.W.M., Turner, D.M., 2011. Monitoring plastic ingestion by the northern fulmar  
16 *Fulmarus glacialis* in the North Sea. *Environ. Pollut.* 159, 2609–2615.  
17 <https://doi.org/10.1016/j.envpol.2011.06.008>
- 18 van Franeker, J.A., Meijboom, A., 2002. LITTER NSV, marine litter monitoring by northern  
19 fulmars; a pilot study (Alterra-rapport 401). Alterra, Green World Research,  
20 Wageningen.
- 21 Wolfram Alpha LLC, 2017. Wolfram|Alpha. Retrieved from <http://www.wolframalpha.com/>
- 22 Woodall, L.C., Gwinnett, C., Packer, M., Thompson, R.C., Robinson, L.F., Paterson, G.L.J.,  
23 2015. Using a forensic science approach to minimize environmental contamination and to  
24 identify microfibrils in marine sediments. *Mar. Pollut. Bull.* 95, 40–46.  
25 <https://doi.org/10.1016/j.marpolbul.2015.04.044>
- 26 Ye, S., Andrady, A.L., 1991. Fouling of floating plastic debris under Biscayne Bay exposure  
27 conditions. *Mar. Pollut. Bull.* 22, 608–613. [https://doi.org/10.1016/0025-326X\(91\)90249-](https://doi.org/10.1016/0025-326X(91)90249-R)  
28 R
- 29 Zarfl, C., Matthies, M., 2010. Are marine plastic particles transport vectors for organic pollutants  
30 to the Arctic? *Mar. Pollut. Bull.* 60, 1810–1814.  
31 <https://doi.org/10.1016/j.marpolbul.2010.05.026>  
32

## 33 Supplementary

### 34 S1: Collection methods

35 The following text outlines collection methods in detail.

#### 36 Scientific surveys

##### 37 *Atlantic cod*

38 Atlantic cod were collected in 2016 during the following trawl surveys: 1) Ecosystem Research  
39 Program surveys conducted by the Department of Fisheries and Oceans (DFO) aboard the vessel  
40 RV *Teleost*, and 2) Transatlantic Added Value survey conducted by the Marine Institute (MI) of



1 Memorial University of Newfoundland aboard the vessel RV *Celtic Explorer*. These surveys are  
2 primarily aimed at assessing stock sizes of various species of fish and invertebrates. DFO trawl  
3 research evaluates the status of Atlantic cod stocks, while MI uses acoustic and trawl methods to  
4 assess different species (Fisheries and Oceans Canada, 2012b; Marine Institute (Foras na Mara),  
5 n.d.). Surveys occurred over the southern and eastern Newfoundland shelf, as well as in the  
6 Davis Strait.

7  
8 Both surveys examined individual Atlantic cod for prey analysis prior to our microplastic  
9 analyses for an unrelated project. Trained technicians from DFO and MI dissected each stomach  
10 from the GI tracts and transferred them to separate, sterile metal trays, where digestive contents  
11 were analyzed. Following this analysis, each stomach and all of its contents were placed into a  
12 plastic bag with the corresponding GI tract. To ensure all particles were transferred, the metal  
13 tray was thoroughly rinsed with a wash bottle and this water was also transferred to the plastic  
14 bag, which was then sealed and frozen for later plastic analysis.

#### 15 *Atlantic salmon*

16 Atlantic salmon were collected at a fish-counting fence in the Campbellton River. Located 220 m  
17 from the mouth of the river, this fence is constructed annually by DFO and used by researchers  
18 to study salmon returning to the river (Downton et al., 2001). Atlantic salmon were collected and  
19 sacrificed so that physiological samples like blood, isotopes, and fatty acids (not related to the GI  
20 tract) could be used for three other research projects. Physiology studies were conducted under  
21 Fisheries and Oceans Canada Experimental Licenses provided to Memorial University, Carleton  
22 University, and DFO. Donations of intact GI tracts were made for this study after the  
23 physiological sampling.

#### 24 *Capelin*

25 Capelin were collected by commercial fishers around the island of Newfoundland and donated to  
26 this study by DFO. Capelin were caught using several fishing methods (cast net, purse seine, and  
27 tuc seine). Whole individuals were frozen immediately after collection and stored for later  
28 dissection and analysis.

#### 29 Citizen science surveys

30 Atlantic cod were collected from the 2015 and 2016 Newfoundland commercial and recreational  
31 fisheries. All individuals examined in this survey were collected directly by fishers from six  
32 coastal communities located along the Eastern Avalon Peninsula, and the GI tracts were donated  
33 to researchers at the wharf when fish were landed. Three of these communities were visited in  
34 2015, and revisited in 2016 (Petty Harbour, Quidi Vidi, and Portugal Cove-St. Philip's) with the  
35 addition of three new communities further south in 2016 (Witless Bay, Bauline East, and Brigus  
36 South). Atlantic cod were caught by one of the following methods: hand-line, jigger, or gill net.  
37 Such methods are advantageous over scientific trawling as no anthropogenic debris accumulates  
38 in the net for possible consumption by captured fish (Davison and Asch, 2011).

39  
40 In the cod surveys from 2015, around 30 fishers participated per collection site whereas in 2016,  
41 between one and seven fishers participated per site. This sampling method is based on fishers'  
42 knowledge of fish aggregations ("good fishing spots"), which increases sampling efficiency



1 (Liboiron et al., 2016). This sampling method has proved efficient by providing a means of  
 2 sampling the human food web directly; all fish analysed were consumed by humans (see also  
 3 Neves et al., 2015; Rochman et al., 2015). The removal of GI tracts (from esophagus to anus)  
 4 occurred at the wharf and was done either by the researcher or the fisher, depending on the  
 5 fisher's preference. Fish were always identified as Atlantic cod by the researcher(s) and other  
 6 data about individual fish (length, sex) was recorded when possible. All GI tracts were  
 7 individually bagged and frozen for further analysis.

## 8 S2: Raman Spectrometry

9 Two of the three microfibrils identified in 2016 were lost prior to Raman micro-spectrometry and  
 10 therefore excluded from the analysis. A total of 10 particles from Atlantic cod caught in 2016,  
 11 one particle from Atlantic salmon, and two particles from capelin were subjected to Raman  
 12 micro-spectrometry. Of the 13 particles analysed with Raman micro-spectrometry, three yielded  
 13 conclusive polymer identifications, five yielded suspected polymer identifications, two particles'  
 14 polymers could not be identified (but were visually identifiable as plastics), two were confirmed  
 15 to be non-plastic and one microfibre was too small to produce a result (Table 4).

16  
 17 **Table S2.** Summary of results for particles subjected to Raman micro-spectrometry analysis.  
 18 Results indicated whether particles were confirmed as plastic (Y, Yes or N, No), whether a  
 19 polymer could be identified (Y, Yes or N, No), and, within particles for which a polymer was  
 20 identified, the confidence of the polymer result (C, conclusive or S, suspect). Dashes indicate  
 21 information could not be determined in the analysis.  
 22

| Species                                   | Particle type | Particle colour | Plastic (Y/N) | Polymer (Y/N) | Confidence (C/S) | Polymer | Density (g/cm <sup>3</sup> )* |
|-------------------------------------------|---------------|-----------------|---------------|---------------|------------------|---------|-------------------------------|
| Atlantic cod<br>( <i>Gadus morhua</i> )   | Fibre         | White           | Y             | Y             | S                | PVC     | 1.15-1.96                     |
|                                           | Fragment      | Grey            | Y             | Y             | S                | ABS     | 0.90-1.53                     |
|                                           | Fibre         | Pink            | Y             | Y             | C                | PET     | 1.38                          |
|                                           | Film          | Green           | Y             | N             | -                | -       | -                             |
|                                           | Fibre         | Green           | Y             | Y             | C                | PE      | 0.92-0.96                     |
|                                           | Fibre         | Blue            | Y             | N             | -                | -       | -                             |
|                                           | Fibre         | White           | Y             | Y             | S                | PE      | 0.92-0.96                     |
|                                           | Fragment      | White+Red       | Y             | Y             | S                | PC      | 1.36                          |
|                                           | Fibre         | White           | Y             | Y             | C                | PE      | 0.92-0.96                     |
|                                           | Unknown       |                 | N             | -             | -                | -       | -                             |
|                                           | Unknown       |                 | N             | -             | -                | -       | -                             |
|                                           | Fragment      | White           | Y             | Y             | S                | PVC     | 1.15-1.96                     |
| Capelin<br>( <i>Mallotus villosus</i> )   | -             | -               | N             | -             | -                | -       | -                             |
|                                           | -             | -               | N             | -             | -                | -       | -                             |
| Atlantic salmon<br>( <i>Salmo salar</i> ) | -             | -               | N             | -             | -                | -       | -                             |

\* Densities listed here correspond to the pure polymer, according to Wolfram Alpha LLC (2017). Actual particle densities will vary from that of their pure form. Seawater density ~ 1.02-1.04 g/cm<sup>3</sup> (Wolfram Alpha LLC, 2017)

23  
 24  
 25  
 26
